# Supplementary material for: The influence of computer-based cognitive flexibility training on subjective cognitive well-being after stroke: A multi-center randomized controlled trial
Source: PubMed Central journal article supplement (PMC5690615; doi:10.1371/journal.pone.0187582), 2017-11-16
Supplement: pone.0187582.s001.pdf [file pone.0187582.s001.pdf]

**S1 Table. Mean (standard deviation) and MANOVA of the outcome measures of per-protocol analyses.**

| measure          | Group                       |               |      |                               |               |      |                             |               |      | Comparison    |                 |            |                 |         |            |
|------------------|-----------------------------|---------------|------|-------------------------------|---------------|------|-----------------------------|---------------|------|---------------|-----------------|------------|-----------------|---------|------------|
|                  | Intervention group (n = 28) |               |      | Active control group (n = 29) |               |      | Waiting list group (n = 20) |               |      | Time          |                 | Time*group |                 |         |            |
|                  | Pre-training                | Post-training | Δ    | Pre-training                  | Post-training | Δ    | Pre-waiting                 | Post-waiting  | Δ    | F             | p-value         | $\eta_p^2$ | F               | p-value | $\eta_p^2$ |
| <i>Primary</i>   |                             |               |      |                               |               |      |                             |               |      | $F_{(5, 70)}$ | <b>&lt;.001</b> | .27        | $F_{(10, 142)}$ | .17     | .09        |
| - CFQ            | 32.5 ( 10.8 )               | 28.9 ( 10.4 ) | 3.7  | 36.0 ( 11.2 )                 | 27.4 ( 10.0 ) | 8.6  | 37.2 ( 14.3 )               | 34.9 ( 14.9 ) | 2.3  | 25.6          | <b>&lt;.001</b> | .26        |                 |         |            |
| - DEX            | 21.4 ( 8.2 )                | 19.6 ( 9.3 )  | 1.8  | 23.8 ( 12.8 )                 | 20.2 ( 10.7 ) | 3.5  | 24.4 ( 9.8 )                | 23.2 ( 11.2 ) | 1.2  | 7.7           | <b>&lt;.01</b>  | .09        |                 |         |            |
| - IADL           | 3.2 ( 3.3 )                 | 3.1 ( 3.0 )   | 0.1  | 3.3 ( 3.7 )                   | 3.0 ( 3.3 )   | 0.3  | 3.3 ( 4.0 )                 | 3.7 ( 4.2 )   | -0.4 | 0.0           | .93             | .00        |                 |         |            |
| - SF-36          | -0.9 ( 1.1 )                | -0.8 ( 1.0 )  | 0.1  | -0.6 ( 1.2 )                  | -0.8 ( 1.2 )  | -0.2 | -0.6 ( 0.7 )                | -0.7 ( 0.9 )  | -0.1 | 0.5           | .47             | .01        |                 |         |            |
| - USER-P         | 77.0 ( 16.1 )               | 74.9 ( 14.7 ) | -2.1 | 74.6 ( 18.1 )                 | 80.0 ( 14.1 ) | 5.4  | 73.4 ( 18.4 )               | 74.4 ( 18.9 ) | 0.9  | 0.7           | .41             | .01        |                 |         |            |
| <i>Secondary</i> |                             |               |      |                               |               |      |                             |               |      | $F_{(3, 72)}$ | .77             | .02        | $F_{(6, 146)}$  | .79     | .02        |
| - Recovery VAS   | 60.3 ( 21.9 )               | 56.8 ( 24.8 ) | -3.5 | 59.5 ( 14.0 )                 | 60.7 ( 18.1 ) | 1.2  | 56.9 ( 25.1 )               | 57.1 ( 26.5 ) | 0.3  |               |                 |            |                 |         |            |
| - CIS-F          | 38.0 ( 12.7 )               | 36.5 ( 14.2 ) | 1.5  | 30.6 ( 13.2 )                 | 30.9 ( 14.2 ) | -0.3 | 36.2 ( 11.9 )               | 34.3 ( 13.0 ) | 1.9  |               |                 |            |                 |         |            |
| - HADS D         | 5.9 ( 4.0 )                 | 6.0 ( 3.7 )   | -0.1 | 5.0 ( 3.6 )                   | 5.1 ( 4.0 )   | -0.1 | 5.1 ( 2.6 )                 | 4.9 ( 3.1 )   | 0.2  |               |                 |            |                 |         |            |
| Cognitive impr.  | n.a.                        | 13.4 ( 4.0 )  | n.a. |                               | 13.3 ( 3.4 )  | n.a. |                             | 13.1 ( 3.5 )  | n.a. |               |                 |            | H = 1.0         | .60     |            |
| <i>Proxy</i>     |                             |               |      |                               |               |      |                             |               |      | $F_{(3, 72)}$ | .77             | .02        | $F_{(6, 146)}$  | .17     | .06        |
| - CFQ            | 27.9 ( 14.5 )               | 28.4 ( 14.2 ) | -0.5 | 34.1 ( 13.0 )                 | 32.2 ( 12.9 ) | 1.9  | 30.2 ( 13.8 )               | 33.3 ( 13.3 ) | -3.1 |               |                 |            | 2.0             |         |            |
| - DEX            | 21.4 ( 13.7 )               | 20.5 ( 15.2 ) | 0.9  | 26.5 ( 11.9 )                 | 25.8 ( 13.2 ) | 0.7  | 22.5 ( 15.8 )               | 24.4 ( 14.9 ) | -1.8 |               |                 |            | 1.4             |         |            |
| - IADL           | 3.3 ( 3.4 )                 | 2.8 ( 2.9 )   | 0.5  | 3.4 ( 3.7 )                   | 3.8 ( 3.8 )   | -0.4 | 4.7 ( 6.1 )                 | 4.1 ( 5.5 )   | 0.6  |               |                 |            | 1.9             |         |            |

*Note* . All scores are total scores where lower scores represent better performance except for SF-36, USER-P, cognitive improvement, and recovery VAS (mm) where higher score reflect better performance; Δ = difference score between pre- and post- measurement recoded in such a way that higher difference score represent improvement; F was based on Pillai's Trace; H was based on Kruskal-Wallis test; Bold values are considered significant and survived Bonferroni-Holm adjustment where appropriate;  $\eta_p^2$  = partial eta squared (effect size); CFQ = Cognitive failure questionnaire; DEX = Dysexecutive Functioning Questionnaire; IADL = Instrumental Activities of Daily Living; SF-36 = Short Form Health Survey- 36; USER-P = Utrechtse Schaal voor Evaluatie en Revalidatie - Participatie; VAS = Visual Analog Scale; CIS-F = Checklist Individual Strength- Fatigue subscale; HADS D = Hospital Anxiety Depression Scale - Depression; n.a. = not applicable.
