# Supplementary material for: The influence of computer-based cognitive flexibility training on subjective cognitive well-being after stroke: A multi-center randomized controlled trial
Source: PubMed Central journal article supplement (PMC5690615; doi:10.1371/journal.pone.0187582), 2017-11-16
Supplement: pone.0187582.s002.pdf [file pone.0187582.s002.pdf]

## Supporting Information - Data preparation

Some variables were transformed for data analyses because they were not normally distributed.

The following formulas were used (Tx = timepoint):

$$\text{DEX} = ((\text{Max\_DEX} + 1 - \text{DEX\_Tx})^{1.11}).$$

$$\text{SF36} = ((4.19 + \text{SF36\_Tx})^{1.95}).$$

$$\text{HADSD} = 0 - \ln(7 + \text{HADS\_D\_Tx}).$$

$$\text{VAS\_Recovery} = 0 - ((\text{Max\_VAS\_Recovery} + 1 - \text{VAS\_Recovery\_Tx})^{0.5}).$$
