# Supplementary material for: The influence of computer-based cognitive flexibility training on subjective cognitive well-being after stroke: A multi-center randomized controlled trial
Source: PLOS journal article supplement (doi:10.1371/journal.pone.0187582), 2017-11-16
Supplement: S2 (10.1371/journal.pone.0187582.s002) [file journal.pone.0187582.s002.pdf]

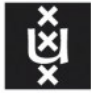

## UvA-DARE (Digital Academic Repository)

### The influence of computer-based cognitive flexibility training on subjective cognitive well-being after stroke

*A multi-center randomized controlled trial*

van de Ven, R.M.; Murre, J.M.J.; Buitenweg, J.I.V.; Veltman, D.J.; Aaronson, J.A.; Nijboer, T.C.W.; Kruiper-Doesborgh, S.J.C.; van Bennekom, C.A.M.; Ridderinkhof, K.R.; Schmand, B.

**DOI**

[10.1371/journal.pone.0187582](https://doi.org/10.1371/journal.pone.0187582)

**Publication date**

2017

**Document Version**

Other version

**Published in**

PLoS ONE

[Link to publication](#)

**Citation for published version (APA):**

van de Ven, R. M., Murre, J. M. J., Buitenweg, J. I. V., Veltman, D. J., Aaronson, J. A., Nijboer, T. C. W., Kruiper-Doesborgh, S. J. C., van Bennekom, C. A. M., Ridderinkhof, K. R., & Schmand, B. (2017). The influence of computer-based cognitive flexibility training on subjective cognitive well-being after stroke: A multi-center randomized controlled trial. *PLoS ONE*, 12(11), Article e0187582. <https://doi.org/10.1371/journal.pone.0187582>

**General rights**

It is not permitted to download or to forward/distribute the text or part of it without the consent of the author(s) and/or copyright holder(s), other than for strictly personal, individual use, unless the work is under an open content license (like Creative Commons).

**Disclaimer/Complaints regulations**

If you believe that digital publication of certain material infringes any of your rights or (privacy) interests, please let the Library know, stating your reasons. In case of a legitimate complaint, the Library will make the material inaccessible and/or remove it from the website. Please Ask the Library: <https://uba.uva.nl/en/contact>, or a letter to: Library of the University of Amsterdam, Secretariat, P.O. Box 19185, 1000 GD Amsterdam, The Netherlands. You will be contacted as soon as possible.  
*UvA-DARE is a service provided by the library of the University of Amsterdam (<https://dare.uva.nl>)*

## Supporting Information - Data preparation

Some variables were transformed for data analyses because they were not normally distributed.

The following formulas were used (Tx = timepoint):

$$\text{DEX} = ((\text{Max\_DEX} + 1 - \text{DEX\_Tx})^{1.11}).$$

$$\text{SF36} = ((4.19 + \text{SF36\_Tx})^{1.95}).$$

$$\text{HADSD} = 0 - \ln(7 + \text{HADS\_D\_Tx}).$$

$$\text{VAS\_Recovery} = 0 - ((\text{Max\_VAS\_Recovery} + 1 - \text{VAS\_Recovery\_Tx})^{0.5}).$$
